# Supplementary material for: To test or not to test: Preliminary assessment of normality when comparing two independent samples
Source: PubMed Central journal article supplement (PMC3444333; doi:10.1186/1471-2288-12-81), 2012-06-19

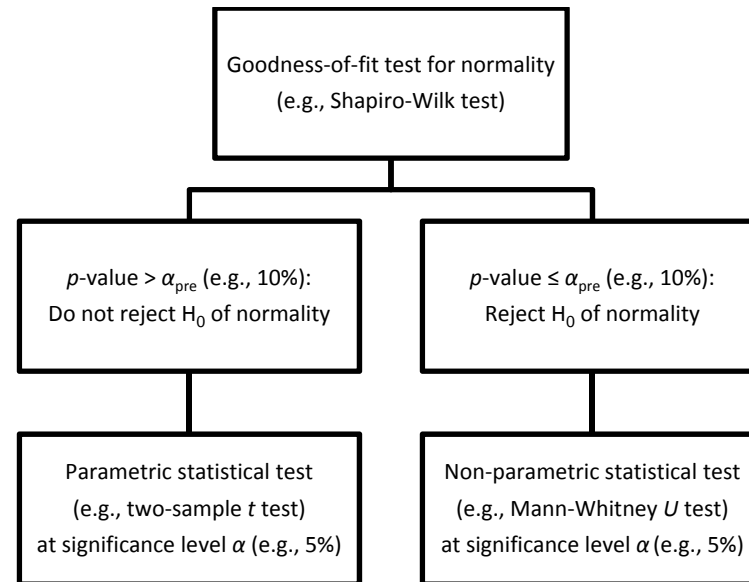

Supplement: 1471-2288-12-81-S1.pdf [file 1471-2288-12-81-S1.pdf]
